# Supplementary material for: Beyond Motor Deficits: Environmental Enrichment Mitigates Huntington’s Disease Effects in YAC128 Mice
Source: MDPI journal article supplement (doi:10.3390/ijms241612607), 2023-08-09
Supplement: s1 [file s1]

## Supplementary Files

**Table S1. Behavioral results for YAC128 and WT mice at 2- and 4 months of age.**

| Test/<br>Age                     | Evaluation           | Two-way ANOVA effects on |                      |                                          |
|----------------------------------|----------------------|--------------------------|----------------------|------------------------------------------|
|                                  |                      | Genotype                 | Environment          | Genotype x<br>environment<br>interaction |
| <b>Pole<br/>Test</b><br>2 m      | Time to<br>descend   | F(1,33)=0.08; p=0.77     | F(1,33)=0.06; p=0.81 | F(1,33)=2.33; p=0.14                     |
| <b>Pole<br/>Test</b><br>4 m      | Time to<br>descend   | F(1,48)=1.94; p=0.17     | F(1,48)=1.71; p=0.20 | F(1,48)=0.91; p=0.34                     |
| <b>Open<br/>Field</b><br><br>2 m | Distance<br>traveled | F(1,33)=0.08; p=0.77     | F(1,33)=1.71; p=0.20 | F(1,33)=0.62; p=0.44                     |
|                                  | Center time          | F(1,33)=0.02; p=0.87     | F(1,33)=0.26; p=0.61 | F(1,33)=0.66; p=0.42                     |
| <b>Open<br/>Field</b><br><br>4 m | Distance<br>traveled | F(1,32)=0.03; p=0.86     | F(1,32)=0.89; p=0.35 | F(1,32)=2.80; p=0.10                     |
|                                  | Center time          | F(1,32)=1.87; p=0.18     | F(1,32)=0.78; p=0.38 | F(1,32)=1.29; p=0.26                     |
